# Supplementary material
Source: PubMed Central journal article supplement (PMC3211139)
Supplement: NIHMS325312-supplement-Supp_Table_S1.pdf [file NIHMS325312-supplement-Supp_Table_S1.pdf]

**Table S1.** Primers used in this study

| <b>Name</b> | <b>Sequence (5' to 3')</b>                                        | <b>Brief Description</b>                          |
|-------------|-------------------------------------------------------------------|---------------------------------------------------|
| TH126       | GACTCTGCAGCTCGAGTATGCAGTGAGGCTCTTATGATT                           | <i>Plef-lacZ</i> insertion                        |
| TH127       | GATAGGATCCATAAAGACGGGACCACTCAAAG                                  | <i>Plef-lacZ</i> insertion                        |
| TH128       | CAGTGGTACCGGGACCAGCCATTATGAAGCAAC                                 | <i>Plef-lacZ</i> insertion                        |
| TH129       | GGAAGAATTCAAGATGAAGATCGACAAAATGGCTC                               | <i>Plef-lacZ</i> insertion                        |
| TH191       | GGTAGTCGACAGGAAAGGAGAATCAATTATAGACATGC                            | <i>atxA</i> rbs Sali                              |
| TH192       | CCTTGCATGCTTATATTATCTTTTTGATTTTCATG                               | <i>atxA</i> stop codon SphI                       |
| TH198       | GGGCATGCTATTTATCATCATCATCTTTATAATCTATTATCTTT<br>TTGATTTTCATGAAAAT | <i>atxA</i> stop codon + FLAG SphI                |
| TH199       | GGGCATGCTAGTGGTGGTGGTGGTGGTGTATTATCTTTTTGATT<br>TCATGAAAAT        | <i>atxA</i> stop codon + His6 SphI                |
| TH228       | CTAAATCTTCAAATTAGTGAAGAACTTGTATTTC                                | <i>atxA</i> C96S                                  |
| TH229       | GAATACAAGTTCTTCACTAATTTGAAGATTTAG                                 | <i>atxA</i> C96S                                  |
| TH216       | ATGTTAAGGTTATATAGTAATATTCCAAATGAT                                 | <i>atxA</i> C161S                                 |
| TH217       | ATCATTTGGAATATTACTATATAACCTTAACAT                                 | <i>atxA</i> C161S                                 |
| TH218       | TCAAAACACAAATTGAGTGTGTTGTTTCGCTATA                                | <i>atxA</i> C202S                                 |
| TH219       | TATAGCGAACAACACACTCAATTTGTGTTTTGA                                 | <i>atxA</i> C202S                                 |
| TH230       | AATACAATTCAAGAAAGTATTAgTAATTTAAAC                                 | <i>atxA</i> C356S                                 |
| TH231       | GTTTAAATTAcTAATACTTTCTTGAATTGTATT                                 | <i>atxA</i> C356S                                 |
| TH222       | TACTCCATTTTCGACAGTTATGAAATTTTCATTA                                | <i>atxA</i> C370S                                 |
| TH223       | TAATGAAATTTTCATAACTGTGCAATGGGAGTA                                 | <i>atxA</i> C370S                                 |
| TH224       | TACACCTCACAAGGAAGTATACATCGAGAG                                    | <i>atxA</i> C402S                                 |
| TH225       | CTCTCGATGTATACTTCCTTGTGAGGTGTA                                    | <i>atxA</i> C402S                                 |
| TH247       | CCAAGTCGACAGGAAAGGAGAATCAATTATAGACATGCTATTTA<br>AAAATAACCCG       | <i>atxA</i> rbs + codon 385 Sali                  |
| TH260       | GGGCATGCTATTTATCATCATCATCTTTATAATCCATACGTTGA<br>GTTTCAAATGCATTG   | <i>atxA</i> codon 385 + FLAG + stop<br>codon SphI |
| TH193       | GCGCGTCGACCTCTAGATTTAAGAAGGAGATATAC                               | GFPmut3a rbs Sali                                 |
| TH234       | GGGCATGCTATTTATCATCATCATCTTTATAATCTTTGTATAGT<br>TCATCCATGCCATG    | GFP mut3a stop codon + FLAG                       |
| JR170       | GGCCGCGGAGAGCCGCATTAAACT                                          | <i>atxA</i> markerless deletion                   |
| JR171       | GGGCATGTCTATAATTGATTCTCCTTTCTG                                    | <i>atxA</i> markerless deletion                   |
| JR172       | GAGAATCAATTATAGACATGCCCTTTAAATATTTGTTTAATGAC<br>AC                | <i>atxA</i> markerless deletion                   |
| JR173       | GGCTCGAGCGCTTGTCTCACAATCTCATC                                     | <i>atxA</i> markerless deletion                   |
